# Supplementary material
Source: MDPI journal article supplement (https://www.mdpi.com/search?q=molecules-24-03890)
Supplement: s001 [file molecules-24-03890-s001.pdf]

Supplementary data

# Brominated Bisindole Alkaloids from the Celtic Seas Sponge *Spongosorites calcicola*

Laurence K. Jennings<sup>1,2</sup>, Neyaz M. D. Khan<sup>3</sup>, Navdeep Kaur<sup>1,2</sup>, Daniel Rodrigues<sup>1,2</sup>, Christine Morrow<sup>4</sup>, Aoife Boyd<sup>3</sup> and Olivier P. Thomas<sup>1,\*</sup>

<sup>1</sup> School of Chemistry, Ryan Institute, National University of Ireland Galway, University Road, Galway H91 TK33, Ireland. [laurence.jennings@nuigalway.ie](mailto:laurence.jennings@nuigalway.ie), [navdeep.kaur@nuigalway.ie](mailto:navdeep.kaur@nuigalway.ie), [daniel.rodrigues@nuigalway.ie](mailto:daniel.rodrigues@nuigalway.ie), [olivier.thomas@nuigalway.ie](mailto:olivier.thomas@nuigalway.ie).

<sup>2</sup> National Marine Biodiscovery Laboratory of Ireland, Marine Institute, Renville West, Oranmore H91 R673, Ireland. [laurence.jennings@marine.ie](mailto:laurence.jennings@marine.ie), [navdeep.kaur@marine.ie](mailto:navdeep.kaur@marine.ie), [daniel.rodrigues@marine.ie](mailto:daniel.rodrigues@marine.ie)

<sup>3</sup> Discipline of Microbiology (School of Natural Sciences), Centre for One Health (Ryan Institute), Infection and Immunity Cluster (NCBES), National University of Ireland Galway, University Road, Galway, H91 TK33, Ireland. [m.khan5@nuigalway.ie](mailto:m.khan5@nuigalway.ie), [aoife.boyd@nuigalway.ie](mailto:aoife.boyd@nuigalway.ie).

<sup>4</sup> Department of Natural Sciences, National Museums Northern Ireland, 153 Bangor Road, Holywood BT18 0EU, Northern Ireland. [christine.morrow@nmni.com](mailto:christine.morrow@nmni.com).

\* Correspondence: [olivier.thomas@nuigalway.ie](mailto:olivier.thomas@nuigalway.ie); Tel.: +353-(0)-8-9455-6289

- P2 **Figure S1.** <sup>1</sup>H NMR spectrum of **1** at 500 MHz in DMSO-*d*<sub>6</sub>.
- P2 **Figure S2.** <sup>13</sup>C NMR spectrum of **1** at 125 MHz in DMSO- *d*<sub>6</sub>.
- P3 **Figure S3.** COSY NMR spectrum of **1** at 500 MHz in DMSO- *d*<sub>6</sub>.
- P3 **Figure S4.** HSQC NMR spectrum of **1** at 500 MHz in DMSO- *d*<sub>6</sub>.
- P4 **Figure S5.** HMBC NMR spectrum of **1** at 600 MHz in DMSO- *d*<sub>6</sub>.
- P4 **Figure S6.** HMBC NMR spectrum of **1** at 600 MHz in DMSO- *d*<sub>6</sub>.
- P5 **Figure S7.** IR spectrum of **1**.
- P5 **Figure S8.** (+)ESIHRMS spectrum of **1**
- P6 **Figure S9.** <sup>1</sup>H NMR spectrum of **2** at 500 MHz in DMSO- *d*<sub>6</sub>
- P6 **Figure S10.** <sup>13</sup>C NMR spectrum of **2** at 125 MHz in DMSO- *d*<sub>6</sub>.
- P7 **Figure S11.** COSY NMR spectrum of **2** at 500 MHz in DMSO- *d*<sub>6</sub>.
- P7 **Figure S12.** HSQC NMR spectrum of **2** at 500 MHz in DMSO- *d*<sub>6</sub>.
- P8 **Figure S13.** HMBC NMR spectrum of **2** at 600 MHz in DMSO- *d*<sub>6</sub>.
- P8 **Figure S14.** HMBC NMR spectrum of **2** at 600 MHz in DMSO- *d*<sub>6</sub>.
- P9 **Figure S15.** Experimental and calculated ECD spectrum of **2**.
- P9 **Figure S16.** (+)ESIHRMS spectrum of **2**
- P10 **Table S1.** Cytotoxicity (μM) of compounds **1-6** against HeLa cells measured after 6 and 24 h incubation.
- P10 **Table S2.** Cytotoxicity (μg/mL) of fractionated sponge extracts against HeLa cells measured after 6 and 24 h incubation.

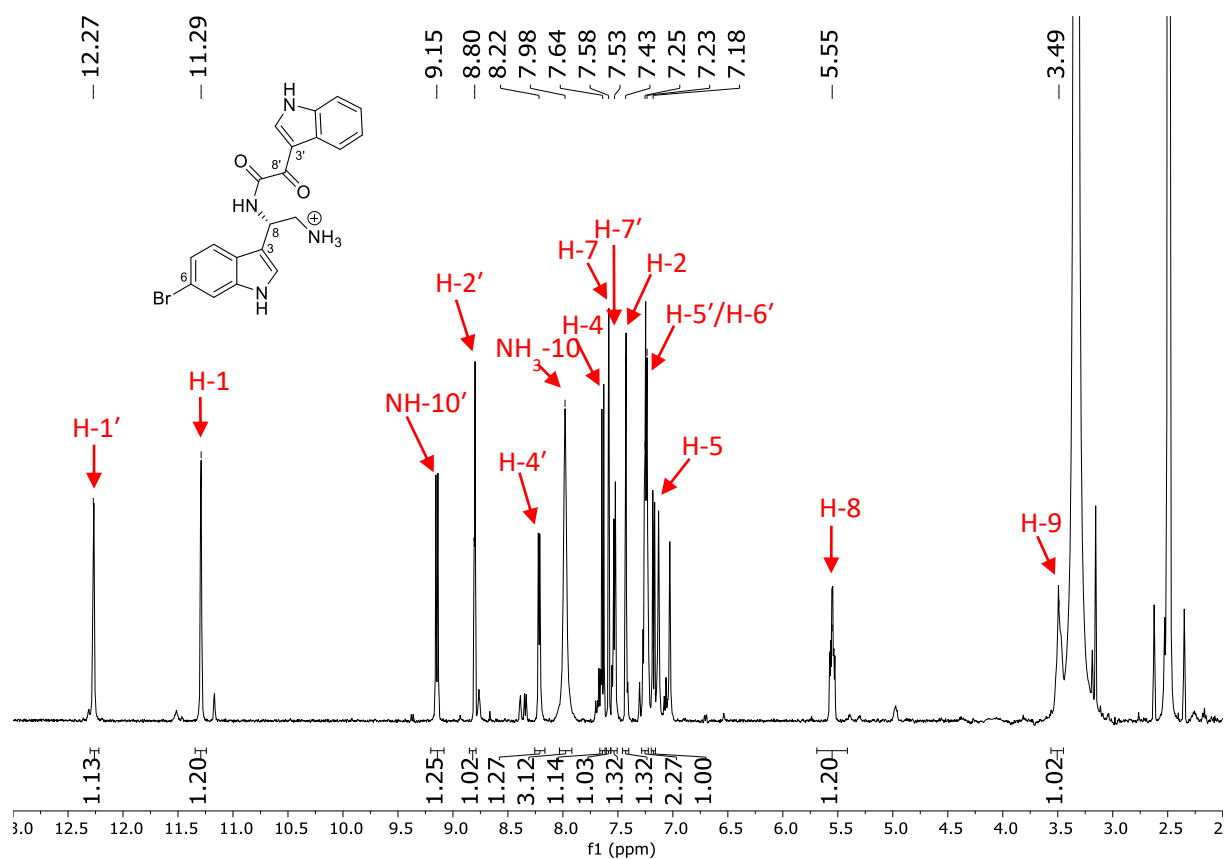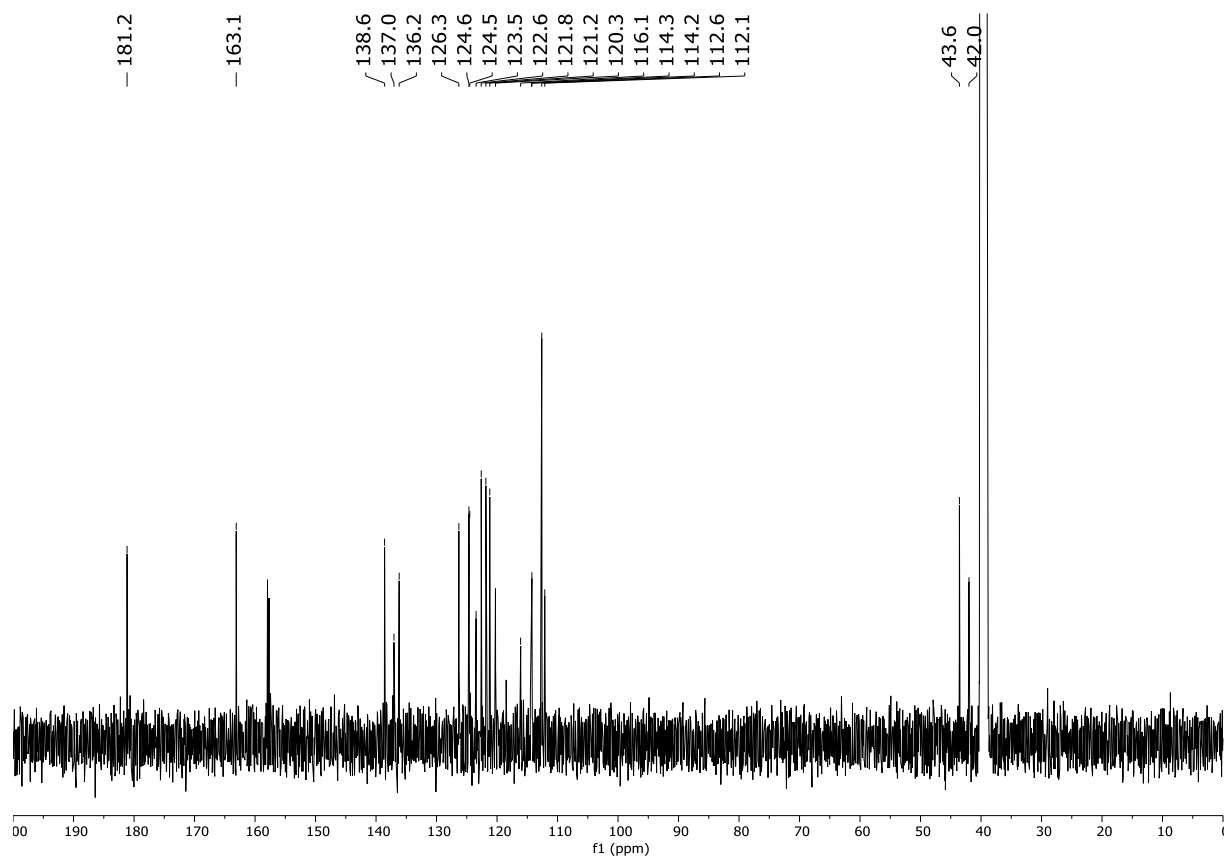

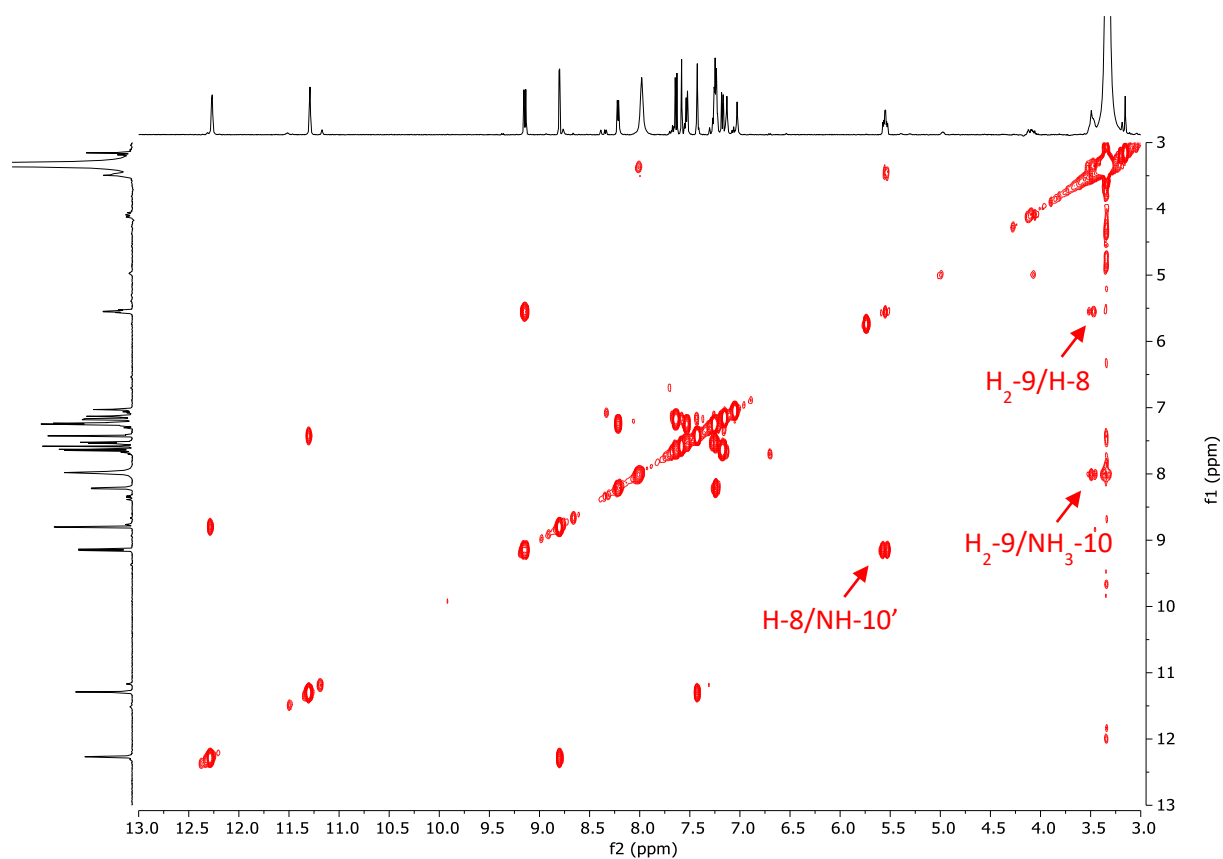

Figure S3. COSY NMR spectrum of **1** at 500 MHz in DMSO-*d*<sub>6</sub>.

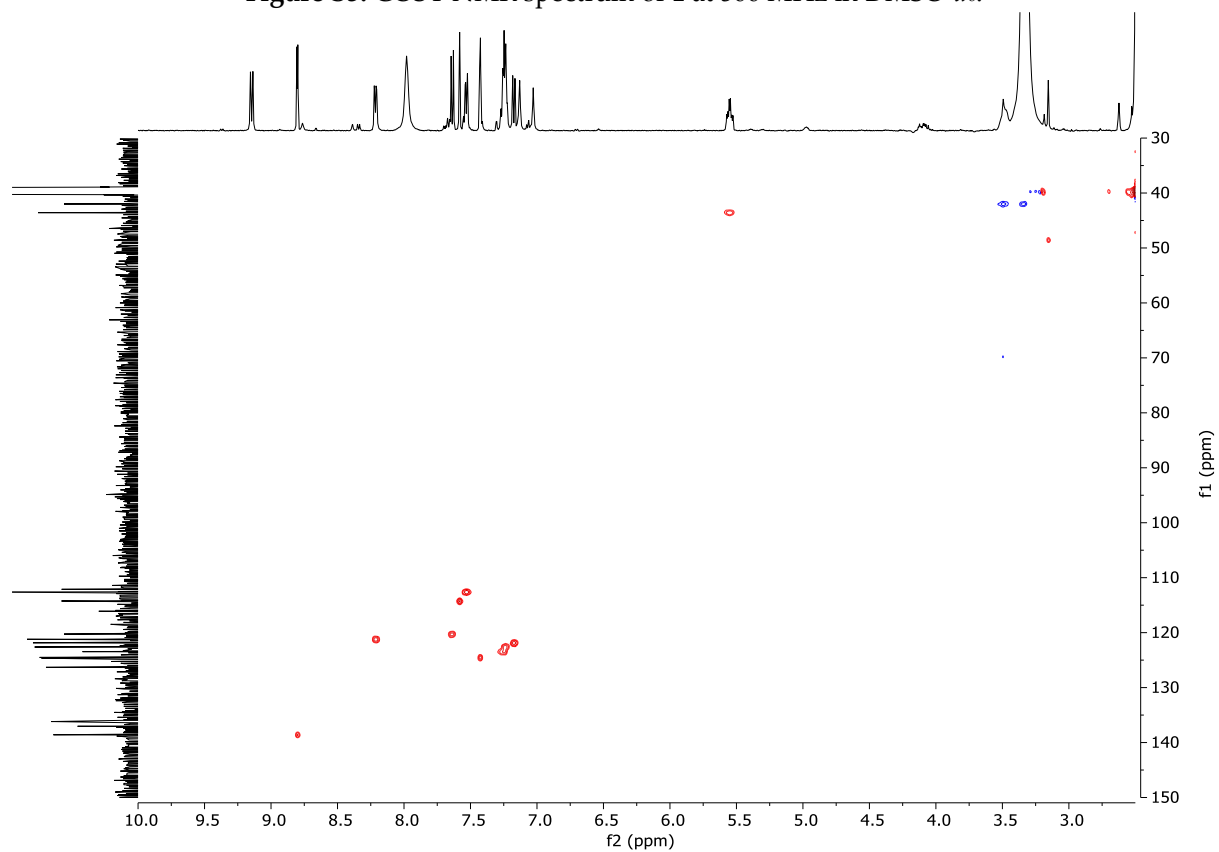

Figure S4. HSQC NMR spectrum of **1** at 500 MHz in DMSO-*d*<sub>6</sub>.

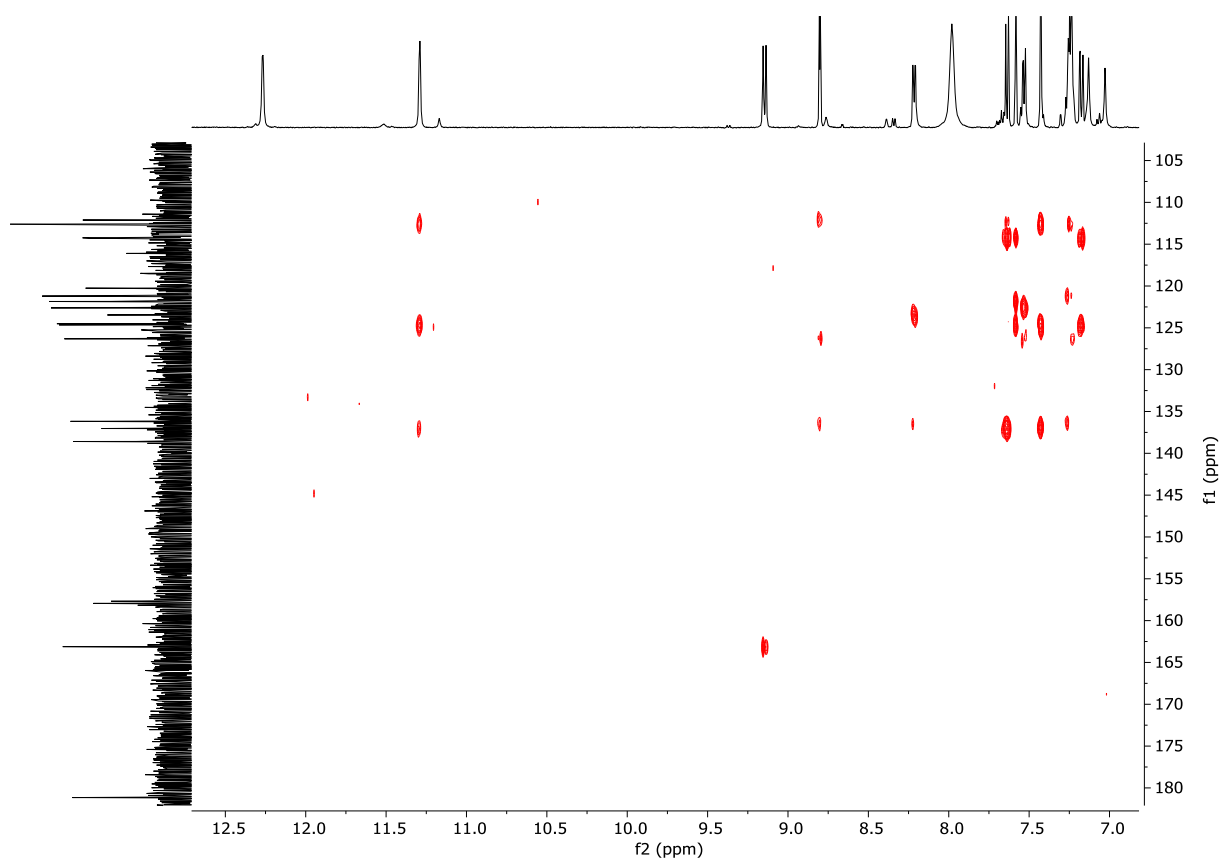

Figure S5. HMBC NMR spectrum of **1** at 600 MHz in DMSO-*d*<sub>6</sub>.

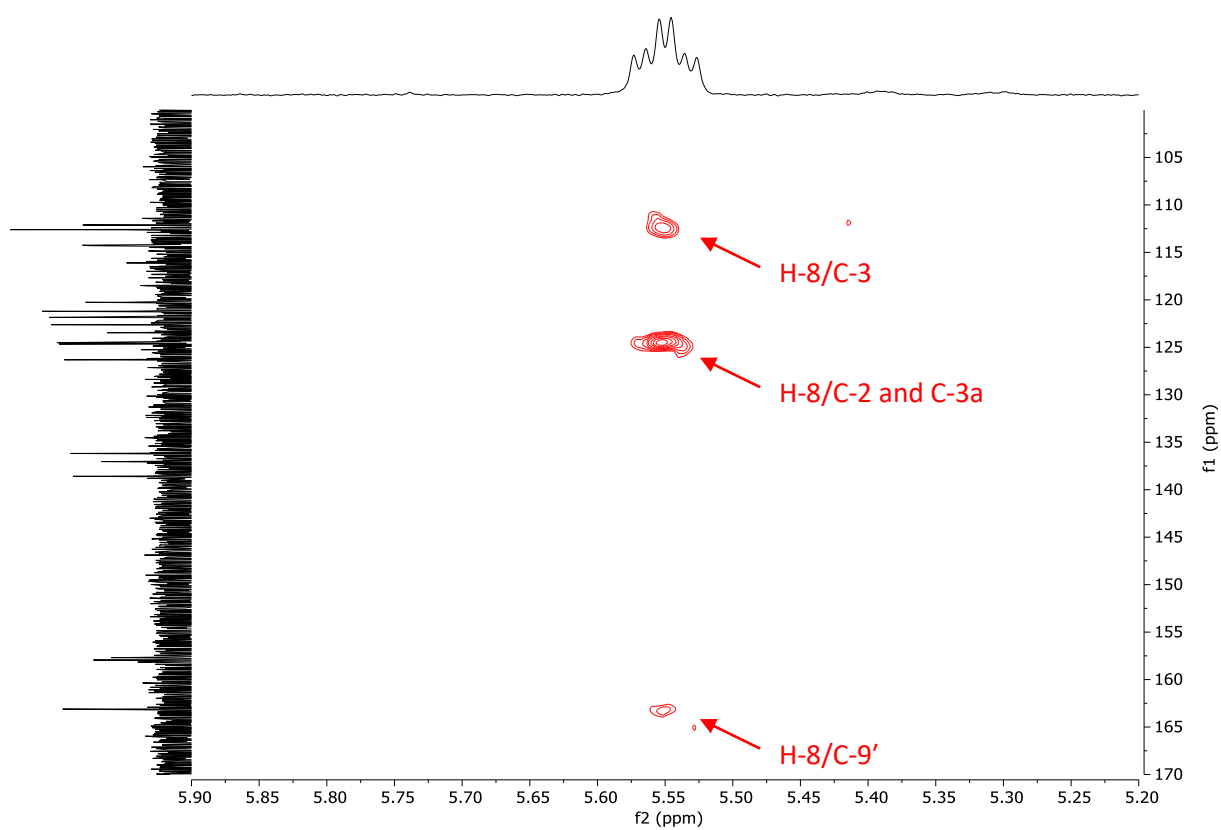

Figure S6. HMBC NMR spectrum of **1** at 600 MHz in DMSO-*d*<sub>6</sub>.

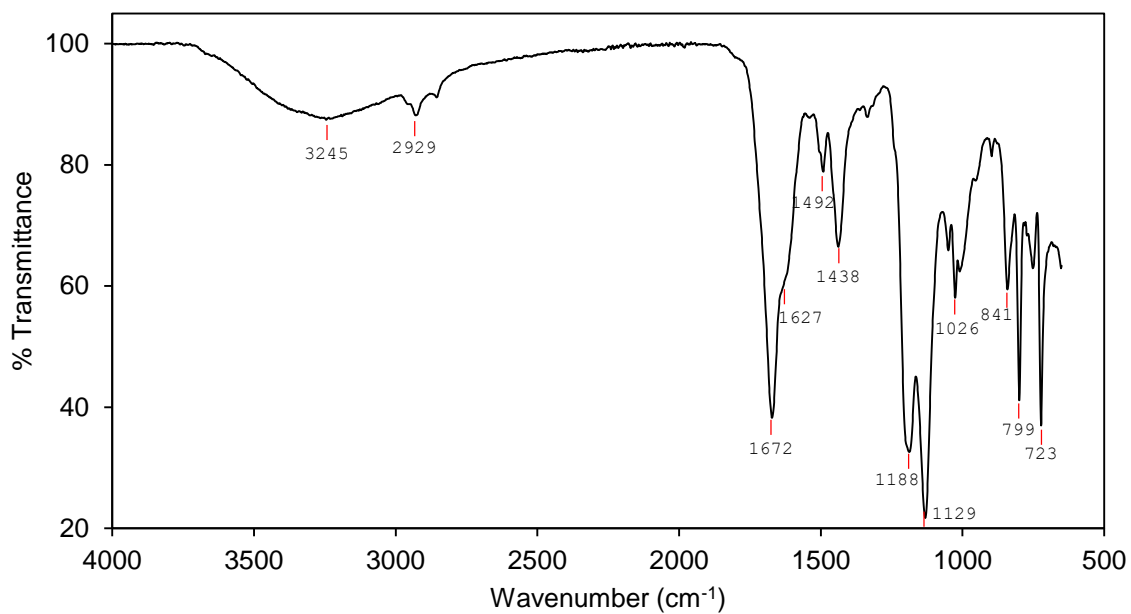

Figure S7. IR spectrum of 1.

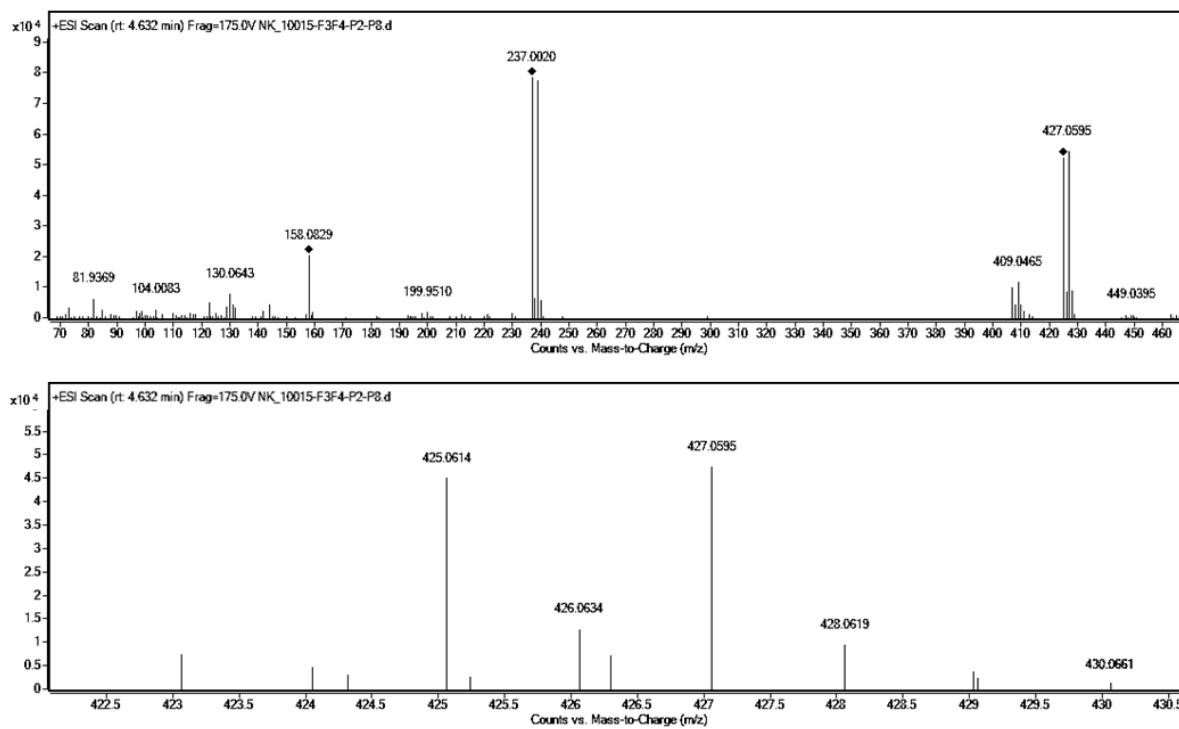

Figure S8. (+)ESIHRMS spectrum of 1

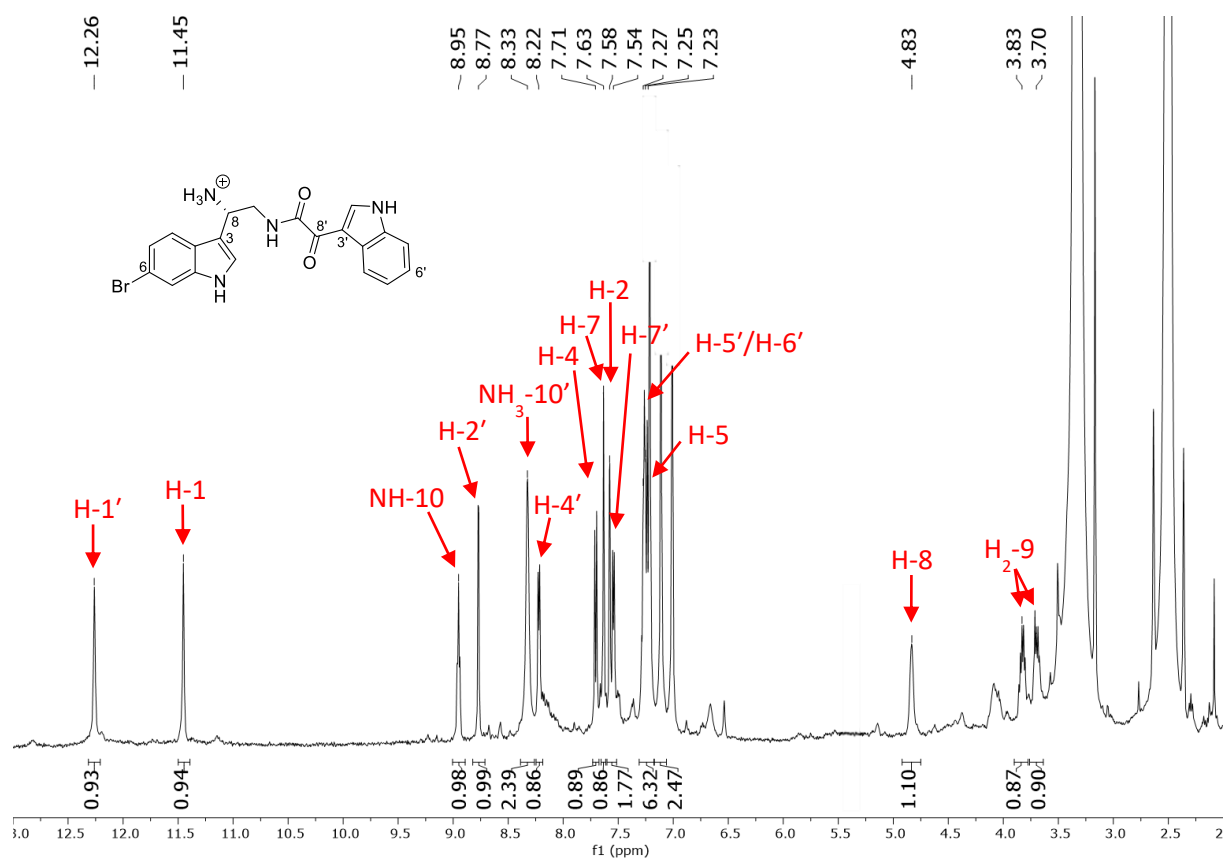Figure S9.  $^1\text{H}$  NMR spectrum of 2 at 500 MHz in  $\text{DMSO-}d_6$ .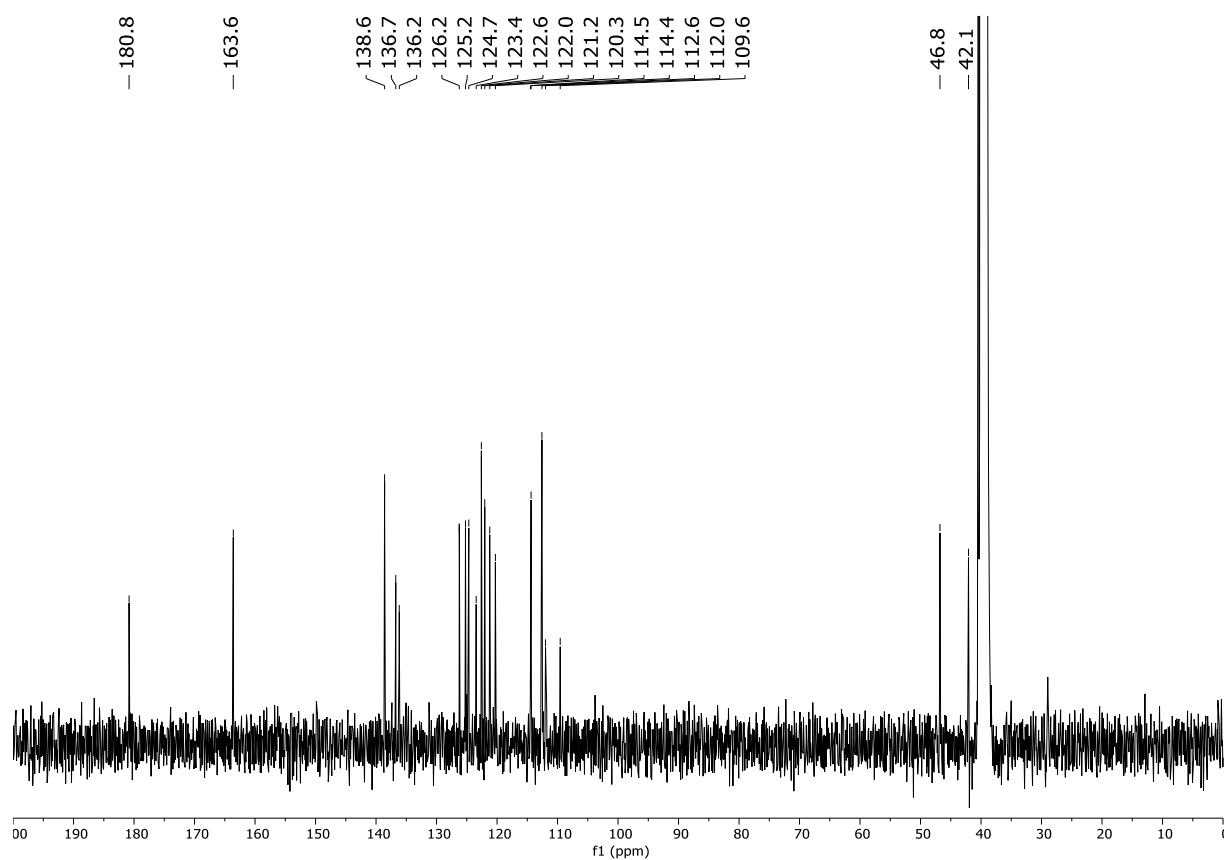Figure S10.  $^{13}\text{C}$  NMR spectrum of 2 at 125 MHz in  $\text{DMSO-}d_6$ .

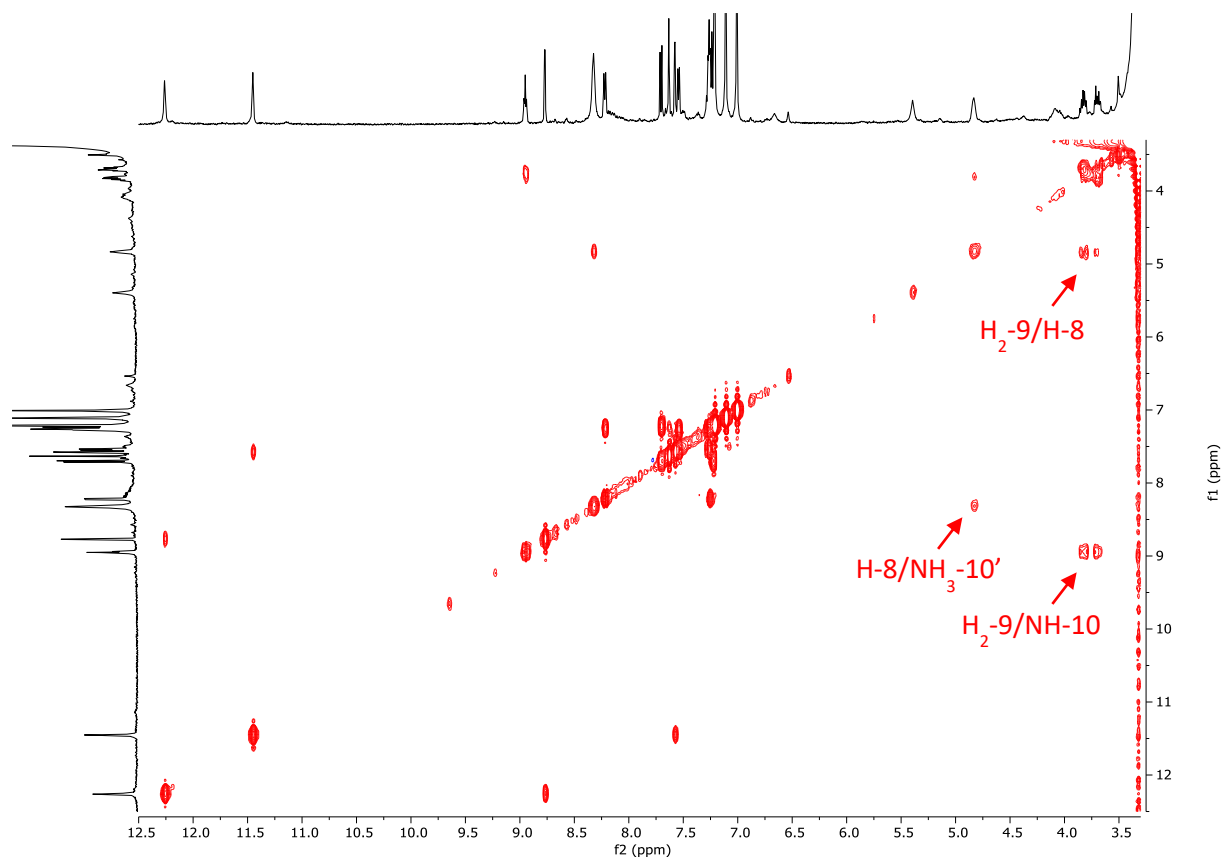

Figure S11. COSY NMR spectrum of **2** at 500 MHz in DMSO-*d*<sub>6</sub>.

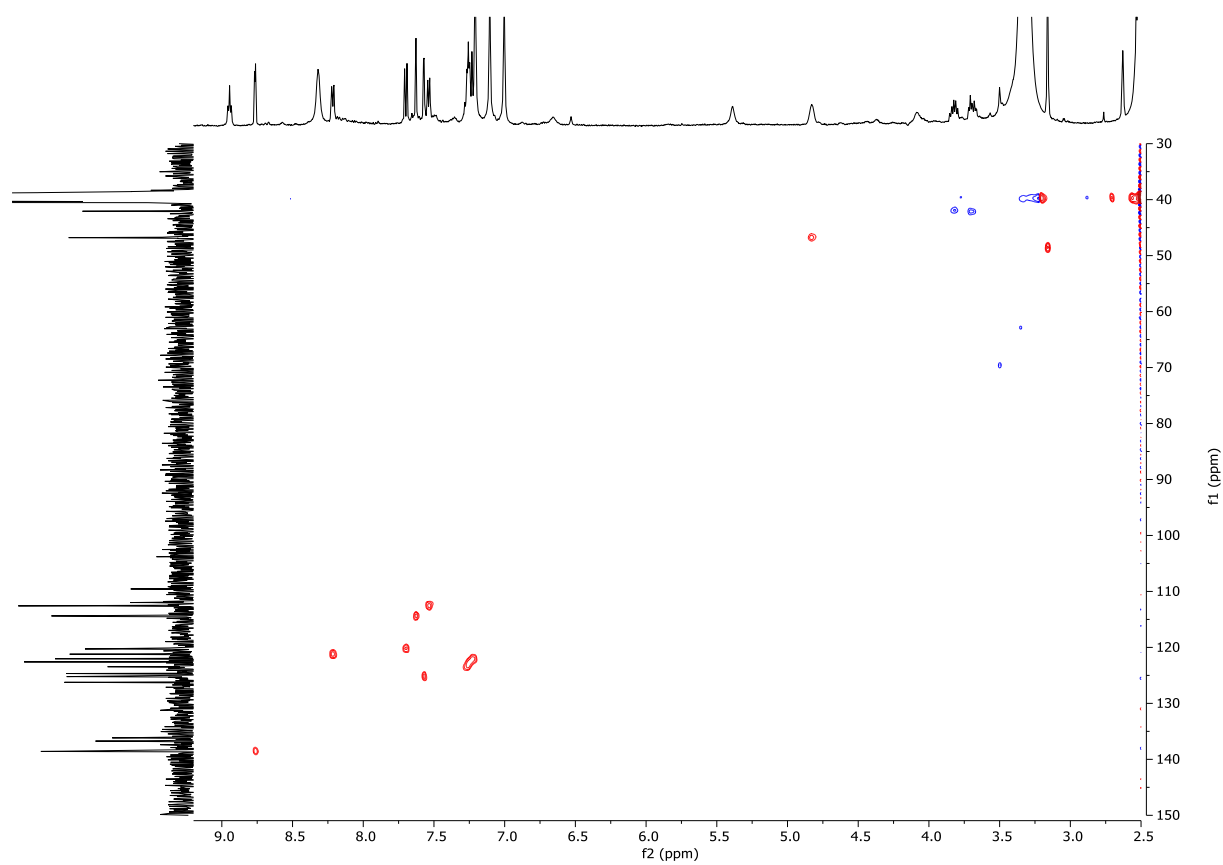

Figure S12. HSQC NMR spectrum of **2** at 500 MHz in DMSO-*d*<sub>6</sub>.

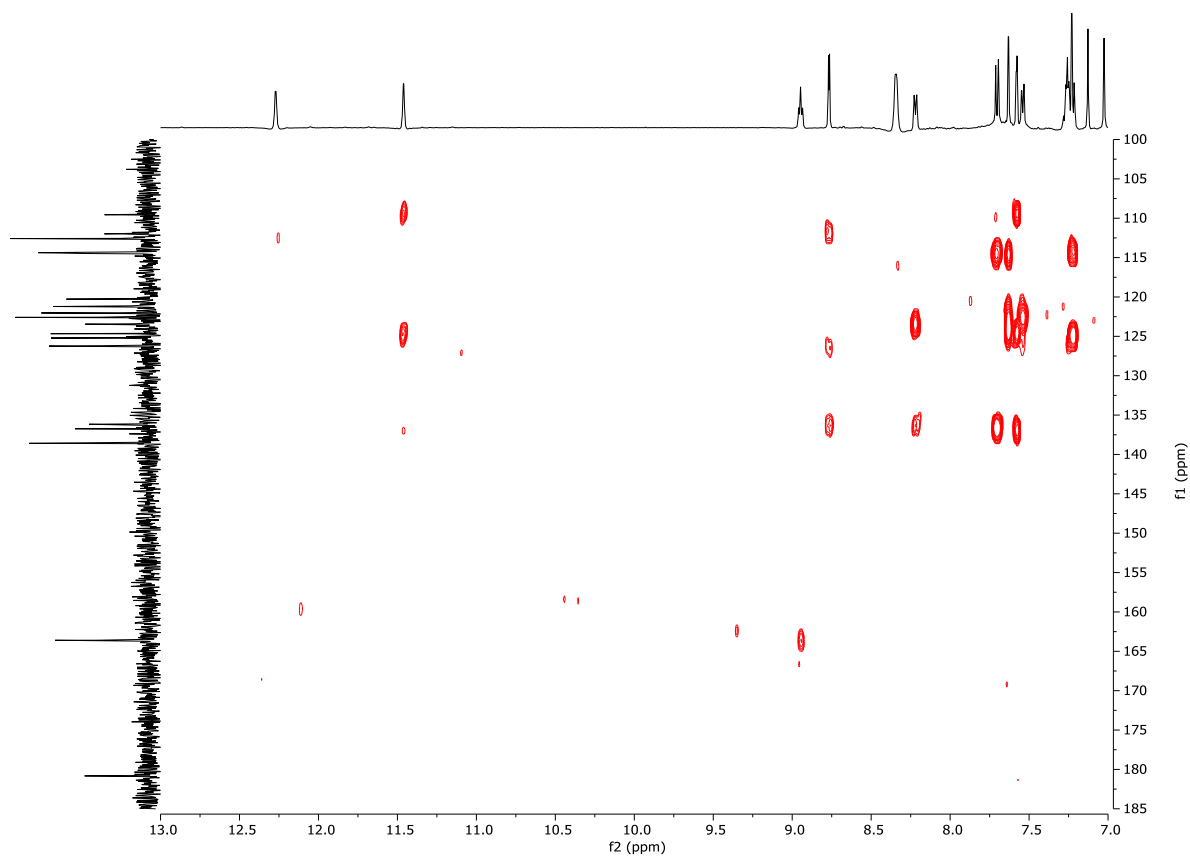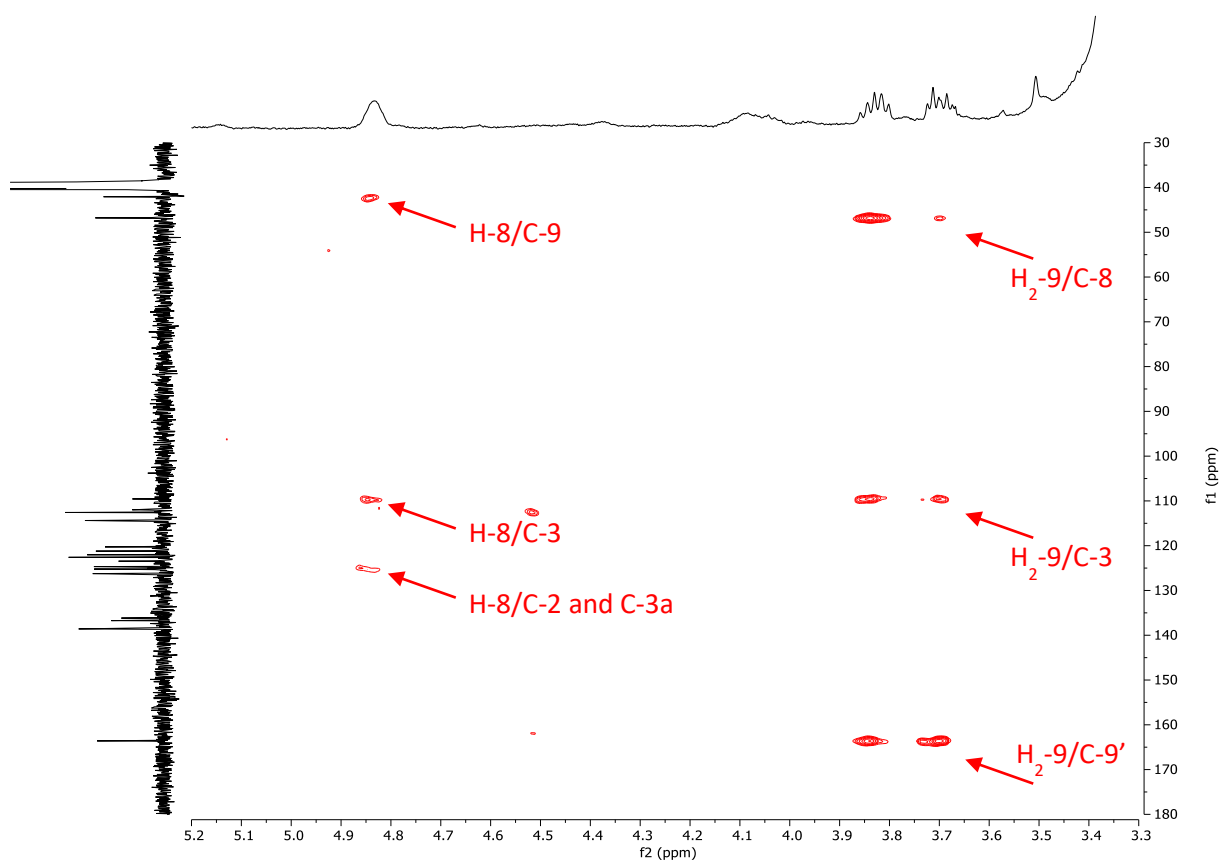



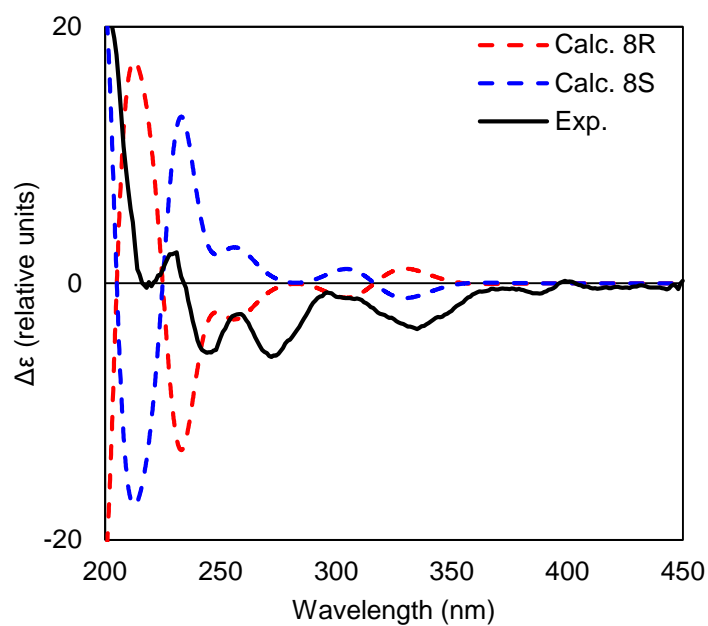

**Figure S15.** The comparison between the experimental and calculated ECD spectrum of **2**. The spectra were calculated using the B3LYP/6-311+G(2d,p)//B3LYP/6-311(2d,p) basis set/functional combination.

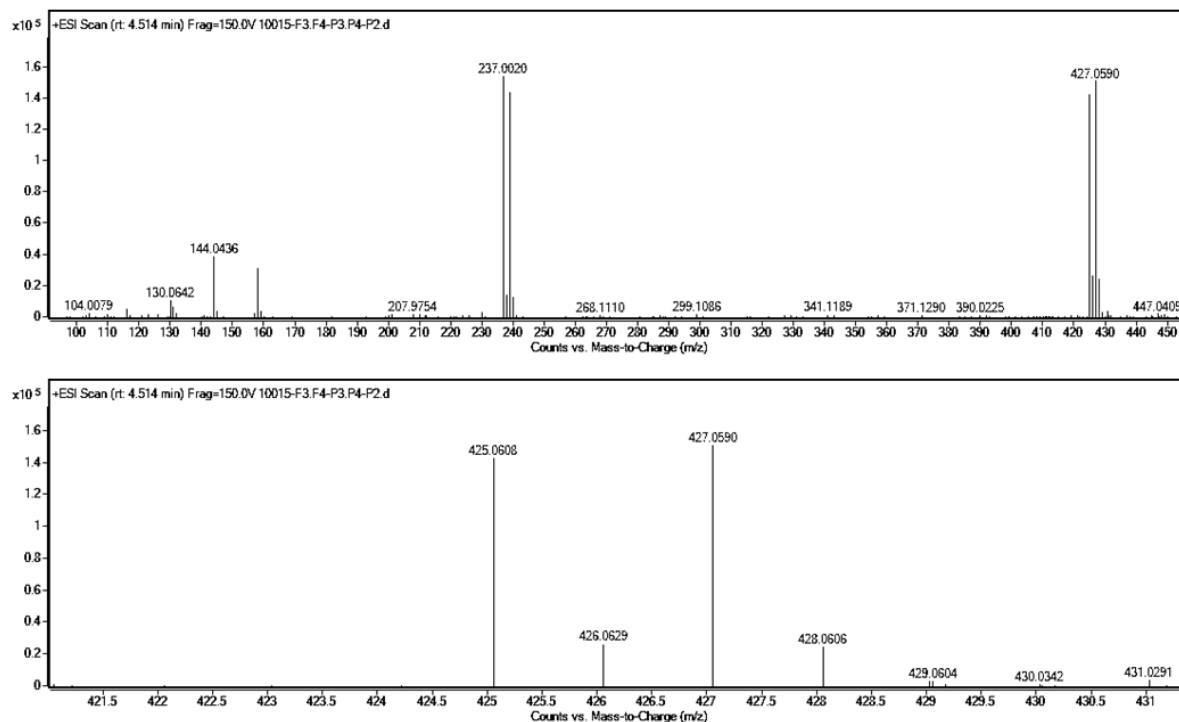

**Figure S16.** (+)ESIHRMS spectrum of **2**

**Table S1.** Cytotoxicity ( $\mu\text{M}$ ) of compounds 1-6 against HeLa cells measured after 6 and 24 h incubation.

| Compound                                   | Cell Lysis IC <sub>50</sub>                            |                                                         |
|--------------------------------------------|--------------------------------------------------------|---------------------------------------------------------|
|                                            | 6 h<br>(IC <sub>50</sub> $\mu\text{M} \pm \text{SD}$ ) | 24 h<br>(IC <sub>50</sub> $\mu\text{M} \pm \text{SD}$ ) |
| Calcicamide A (1)                          | >200                                                   | >200                                                    |
| Calcicamide B (2)                          | 165 $\pm$ 7                                            | 146 $\pm$ 13                                            |
| <i>trans</i> -3,4-Dihydrohamacanthin A (3) | >200                                                   | >200                                                    |
| Bromodeoxytopsentin (4)                    | >200                                                   | 125 $\pm$ 2                                             |
| Bromotopsentin (5)                         | >200                                                   | 123 $\pm$ 13                                            |
| Spongotone A (6)                           | 136 $\pm$ 5                                            | 115 $\pm$ 4                                             |

**Table S2.** Cytotoxicity of fractionated sponge extracts at 100  $\mu\text{g}/\text{mL}$  against HeLa cells measured after 6 and 24 h incubation.

| Sponge species                           | Fraction <sup>a</sup> | % Cell Lysis at 100 $\mu\text{g}/\text{mL}$ |                                         |
|------------------------------------------|-----------------------|---------------------------------------------|-----------------------------------------|
|                                          |                       | 6 h<br>(% $\pm$ SD)                         | 24 h<br>(% $\pm$ SD)                    |
| <i>Axinella dissimilis</i>               | fwm                   | 2 $\pm$ 2                                   | 6 $\pm$ 3                               |
|                                          | fm                    | 2 $\pm$ 1                                   | 8 $\pm$ 4                               |
|                                          | fmd                   | 3 $\pm$ 1                                   | 6 $\pm$ 4                               |
| <i>Clathrina coriacea</i>                | fwm                   | 3 $\pm$ 1                                   | 6 $\pm$ 3                               |
|                                          | fm                    | 3 $\pm$ 2                                   | 16 $\pm$ 5                              |
|                                          | fmd                   | 3 $\pm$ 2                                   | 9 $\pm$ 7                               |
| <i>Clathria (Microciona) strepsitoxa</i> | fwm                   | 3 $\pm$ 2                                   | 5 $\pm$ 3                               |
|                                          | fm                    | 3 $\pm$ 2                                   | 5 $\pm$ 2                               |
|                                          | fmd                   | 3 $\pm$ 3                                   | 6 $\pm$ 1                               |
| <i>Halichondria panicea</i>              | fwm                   | 4 $\pm$ 2                                   | 5 $\pm$ 2                               |
|                                          | fm                    | 2 $\pm$ 2                                   | 3 $\pm$ 1                               |
|                                          | fmd                   | 2 $\pm$ 2                                   | 4 $\pm$ 1                               |
| <i>Lophon hyndmani</i>                   | fwm                   | 2 $\pm$ 2                                   | 6 $\pm$ 2                               |
|                                          | fm                    | 4 $\pm$ 2                                   | 13 $\pm$ 6                              |
|                                          | fmd                   | 4 $\pm$ 2                                   | 9 $\pm$ 5                               |
| <i>Mycale rotalis</i>                    | fwm                   | 3 $\pm$ 2                                   | 6 $\pm$ 3                               |
|                                          | fm                    | 4 $\pm$ 1                                   | 4 $\pm$ 1                               |
|                                          | fmd                   | 4 $\pm$ 3                                   | 5 $\pm$ 2                               |
| <i>Polymastia boletiformis</i>           | fwm                   | 2 $\pm$ 1                                   | 5 $\pm$ 2                               |
|                                          | fm                    | 2 $\pm$ 1                                   | 6 $\pm$ 5                               |
|                                          | fmd                   | 2 $\pm$ 1                                   | 3 $\pm$ 2                               |
| <i>Polymastia penicillus</i>             | fwm                   | 4 $\pm$ 3                                   | 8 $\pm$ 6                               |
|                                          | fm                    | 8 $\pm$ 3                                   | 23 $\pm$ 6                              |
|                                          | fmd                   | 3 $\pm$ 1                                   | 8 $\pm$ 4                               |
| <i>Spongosorites calcicola</i>           | fwm                   | <b>43<math>\pm</math>8</b> <sup>b</sup>     | <b>61<math>\pm</math>6</b> <sup>b</sup> |
|                                          | fm                    | 15 $\pm$ 6                                  | 17 $\pm$ 2                              |
|                                          | fmd                   | 3 $\pm$ 2                                   | 6 $\pm$ 4                               |
| <i>Tethya sp</i>                         | fwm                   | 3 $\pm$ 2                                   | 6 $\pm$ 4                               |
|                                          | fm                    | 2 $\pm$ 1                                   | 4 $\pm$ 1                               |
|                                          | fmd                   | 6 $\pm$ 3                                   | 10 $\pm$ 1                              |

<sup>a</sup> SPE fractions of crude extracts: desalting: water elution; fwm : water:methanol (1 :1) elution; fm: methanol elution; fmd: methanol:dichloromethane (1 :1) elution. <sup>b</sup> Bold values indicate cytotoxicity 2 standard deviations from the mean cytotoxicity.
